# Supplementary material for: LC-MS-based plasma metabolomics reveals metabolic variations in ovariectomy-induced osteoporosis in female Wistar rats
Source: Royal Society of Chemistry journal article supplement (doi:10.1039/c8ra03629b), 2018-01-01
Supplement: c8ra03629b1.pdf [file c8ra03629b1.pdf]

**Supplementary table 1** Potential biomarkers of differentially expressed metabolites in ovariectomy-induced osteoporosis in female wistar rats using plasma metabolomics strategy.

| No. | Rt(min) | Ion form | m/z    | Proposed compound    | Formula                                                      | Trend in model |
|-----|---------|----------|--------|----------------------|--------------------------------------------------------------|----------------|
| 1   | 3.67    | M+H      | 516.30 | Taurocholic acid     | C <sub>26</sub> H <sub>45</sub> NO <sub>7</sub> S            | ↑              |
| 2   | 3.80    | M+H      | 466.32 | Glycocholic acid     | C <sub>26</sub> H <sub>43</sub> NO <sub>6</sub>              | ↑              |
| 3   | 9.89    | M-H      | 327.23 | Docosahexaenoic acid | C <sub>22</sub> H <sub>32</sub> O <sub>2</sub>               | ↓              |
| 4   | 5.88    | M+H      | 482.33 | LysoPC(15:0)         | C <sub>23</sub> H <sub>48</sub> NO <sub>7</sub> P            | ↑              |
| 5   | 10.57   | M+H      | 552.41 | LysoPC(20:0)         | C <sub>28</sub> H <sub>58</sub> NO <sub>7</sub> P            | ↑              |
| 6   | 11.21   | M+H      | 133.09 | Leucinic acid        | C <sub>6</sub> H <sub>12</sub> O <sub>3</sub>                | ↓              |
| 7   | 11.17   | M-H      | 255.23 | Palmitic acid        | C <sub>16</sub> H <sub>32</sub> O <sub>2</sub>               | ↓              |
| 8   | 0.55    | M-H      | 145.10 | L-Lysine             | C <sub>6</sub> H <sub>14</sub> N <sub>2</sub> O <sub>2</sub> | ↓              |
| 9   | 11.42   | M+H      | 305.25 | Arachidonic acid     | C <sub>20</sub> H <sub>32</sub> O <sub>2</sub>               | ↑              |
| 10  | 3.90    | M+H      | 347.22 | Corticosterone       | C <sub>21</sub> H <sub>30</sub> O <sub>4</sub>               | ↑              |
| 11  | 8.77    | M+H      | 482.33 | LysoPE(18:0/0:0)     | C <sub>23</sub> H <sub>48</sub> NO <sub>7</sub> P            | ↓              |
| 12  | 8.43    | M-H      | 508.34 | LysoPE(20:0/0:0)     | C <sub>25</sub> H <sub>52</sub> NO <sub>7</sub> P            | ↓              |
| 13  | 4.22    | M+H      | 834.61 | PS(15:0/24:0)        | C <sub>45</sub> H <sub>88</sub> NO <sub>10</sub> P           | ↓              |
| 14  | 1.72    | M+H      | 132.10 | L-Isoleucine         | C <sub>6</sub> H <sub>13</sub> NO <sub>2</sub>               | ↑              |
| 15  | 9.90    | M-H      | 253.22 | Palmitoleic acid     | C <sub>16</sub> H <sub>30</sub> O <sub>2</sub>               | ↑              |
| 16  | 11.19   | M+H      | 301.22 | 4-Oxoretinol         | C <sub>20</sub> H <sub>28</sub> O <sub>2</sub>               | ↓              |
| 17  | 0.72    | M-H      | 89.02  | Glyceraldehyde       | C <sub>3</sub> H <sub>6</sub> O <sub>3</sub>                 | ↓              |
| 18  | 4.22    | M-H      | 407.28 | Ursocholic acid      | C <sub>24</sub> H <sub>40</sub> O <sub>5</sub>               | ↑              |
